# Supplementary material for: Targeting of Pancreatic Glia in Type 1 Diabetes
Source: Oxford University Press journal article supplement (doi:10.2337/db07-0226), 2008-01-16
Supplement: db070226supplementarytable1.doc [file db070226supplementarytable1.doc]

Table S1: Top Responding I-Ag7 Epitopes After GFAP-IFA Immunization (Mean SI = 1.5 ± 0.3)

| **Peptide #** | **SI** | **Amino Acid Position** | **Amino Acid Sequence** |
| --- | --- | --- | --- |
| 11 | 2.1± 0.9 | 51-65 | LAGALNAGFKETRAS |
| 20 | 2.5 ± 1.2 | 96-110 | AELNQLRAKEPTKLA |
| 24 | 2.1 ± 0.9 | 116-130 | ELRELRLRLDQLTAN |
| 42 | 2.1 ± 1.0 | 206-220 | RELREQLAQQQVHVE |
| 44 | 2.6 ± 1.5 | 216-230 | QVHVEMDVAKPDLTA |
| 49 | 2.2 ± 0.7 | 241-255 | AVATSNMQETEEWYR |
| 65 | 1.9 ± 0.8 | 321-335 | YQEALARLEEEGQSL |
| 67 | 2.1 ± 0.8 | 331-345 | EGQSLKEEMARHLQE |
| 76 | 2.0 ± 0.6 | 376-385 | IPVQTFSNLQIRETS |

Table S2: Algorithm Predicted GFAP Kd Epitopes

| **GFAP Amino Acid** | **Sequence** | **BIMAS Score** |
| --- | --- | --- |
| 79-87 | S**Y**IEKVRF**L** | 4800 |
| 253-261 | W**Y**RSKFAD**L** | 2800 |
| 112-120 | V**Y**QAELRE**L** | 2400 |
| 200-208 | I**Y**EEEVRE**L** | 2400 |
| 320-328 | S**Y**QEALAR**L** | 2400 |

| **GFAP Amino Acid** | **Sequence** | **SYFPEITHI** |
| --- | --- | --- |
| 320-328 | S**Y**QEALAR**L** | 26 |
| 79-87 | S**Y**IEKVRF**L** | 25 |
| 112-120 | V**Y**QAELRE**L** | 23 |
| 253-261 | W**Y**RSKFAD**L** | 22 |
| 281-288 | D**Y**RRQLQA**L** | 21 |

Table S3: Top Responding I-Ag7 Epitopes After GFAP-CFA Immunization (Mean SI = 2.3 ± 0.7)

| **Peptide #** | **SI** | **Amino Acid Position** | **Amino Acid Sequence** |
| --- | --- | --- | --- |
| 16 | 3.5 ± 1.1 | 76-90 | RFASYIEKVRFLEQQ |
| 19 | 3.3 ± 1.0 | 91-105 | NKALAAELNQLRAKE |
| 22 | 5.3 ± 3.1 | 106-120 | PTKLADVYQAELREL |
| 23 | 3.3 ± 1.5 | 111-125 | DVYQAELRELRLRLD |
| 34 | 3.3 ± 0.7 | 166-180 | LAAYRQEAHEATLAR |
| 37 | 3.3 ± 1.7 | 181-195 | VDLERKVESLEEEIQ |
| 40 | 3.2 ± 1.6 | 196-210 | FLRKIYEEEVRDLRE |
| 46 | 3.5 ± 2.0 | 226-240 | PDLTAALREIRTQYE |
| 65 | 3.3 ± 1.2 | 321-335 | YQEALARLEEEGQSL |
